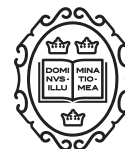

Original article

# Parental age and the risk of autism spectrum disorders: findings from a Swedish population-based cohort

Selma Idring,<sup>1,2\*</sup> Cecilia Magnusson,<sup>1,3</sup> Michael Lundberg,<sup>1</sup> Mats Ek,<sup>1,4</sup> Dheeraj Rai,<sup>1,5,6</sup> Anna C Svensson,<sup>1,3</sup> Christina Dalman,<sup>1,3</sup> Håkan Karlsson<sup>7</sup> and Brian K Lee<sup>8,9</sup>

<sup>1</sup>Department of Public Health Sciences, Karolinska Institutet, Stockholm, Sweden, <sup>2</sup>Neurodevelopmental Psychiatry Unit, Child and Youth Psychiatry, Stockholm County Council, Sweden, <sup>3</sup>Centre for Epidemiology and Community Medicine, Stockholm County Council, Sweden, <sup>4</sup>Huddinge Psychosis Outpatient Unit, Stockholm, Sweden, <sup>5</sup>Academic Unit of Psychiatry, School of Social and Community Medicine, University of Bristol, Bristol, UK, <sup>6</sup>Avon and Wiltshire Partnership NHS Mental Health Trust, Bristol, UK, <sup>7</sup>Department of Neuroscience, Karolinska Institutet, Stockholm, Sweden, <sup>8</sup>Department of Epidemiology and Biostatistics, Drexel University School of Public Health, Philadelphia, PA, USA and <sup>9</sup>A.J. Drexel Autism Institute, Philadelphia, PA, USA

\*Corresponding author. Department of Public Health Sciences, Karolinska Institutet, Widerströmska Huset, Tomtebodavägen 18A, SE 171 77, Sweden. E-mail: Selma.idring@ki.se

Accepted 1 November 2013

## Abstract

**Background:** The objectives of this study were to examine the independent and dependent associations of maternal and paternal age and risk of offspring autism spectrum disorders (ASD), with and without intellectual disability (ID).

**Methods:** The sample consisted of 417 303 Swedish children born 1984–2003. ASD case status (N = 4746) was ascertained using national and regional registers. Smoothing splines in generalized additive models were used to estimate associations of parental age with ASD.

**Results:** Whereas advancing parental age increased the risk of child ASD, maternal age effects were non-linear and paternal age effects were linear. Compared with mothers at the median age 29 years, those <29 had similar risk, whereas risk increased after age 30, with an odds ratio (OR) of 1.75 [95% (CI): 1.63–1.89] at ages 40–45. For fathers, compared with the median age of 32 years, the OR for ages 55–59 was 1.39 (1.29–1.50). The risk of ASD was greater for older mothers as compared with older fathers. For example, mothers aged 40–45 (≥97.2th percentile) had an estimated 18.63 (95% CI: 17.25–20.01) ASD cases per 1000 births, whereas fathers aged 55–59 (≥99.7th percentile) had 16.35 (95% CI: 15.11–17.58) ASD cases per 1000 births. In analyses stratified by

co-parental age, increased risk due to advancing paternal age was evident only with mothers  $\leq 35$  years. In contrast, advancing maternal age increased risk regardless of paternal age. Advancing parental age was more strongly associated with ASD with ID, compared with ASD without ID.

**Conclusions:** We confirm prior findings that advancing parental age increases risk of ASD, particularly for ASD with ID, in a manner dependent on co-parental age. Although recent attention has emphasized the effects of older fathers on ASD risk, an increase of  $n$  years in maternal age has greater implications for ASD risk than a similar increase in paternal age.

**Key words:** Autism spectrum disorders, intellectual disability, risk factors, parental age

#### Key Messages

- Advancing parental age increased the risk of offspring autism spectrum disorders (ASD). Maternal age effects were non-linear whereas paternal age effects were linear.
- The risk of ASD was greater for older mothers, as compared with older fathers.
- In analyses stratified by co-parental age, increased risk of offspring ASD due to advancing paternal age was evident only in mothers aged  $\leq 35$  years. Advancing maternal age increased risk of offspring ASD regardless of paternal age.
- Advancing parental age was more strongly associated with ASD with intellectual disability, compared to ASD without intellectual disability.

## Introduction

Parental age has attracted considerable attention as a potential risk factor for autism spectrum disorders (ASD) in offspring, since parental age at childbearing has increased in the Western world during latter decades.<sup>1</sup> To date, over 30 epidemiological studies have examined parental age in relation to ASD, including recent meta-analyses of paternal age,<sup>2</sup> maternal age<sup>3</sup> or both maternal and paternal age.<sup>4</sup> These meta-analyses suggest that both maternal and paternal advanced age are independently associated with increased risk for ASD. However, as it is increasingly apparent that ASD represent a heterogeneous group of disorders with potentially different aetiologies,<sup>5</sup> there is a need of studies of parental age effects on different phenotypes of ASD. To date, few studies have examined whether associations between parental age and ASD differ by intellectual disability (ID), which is the most frequent co-occurring condition in ASD and is associated with poor outcome.<sup>6</sup> Studies published to date have had contradictory results, which may be due to small numbers of ASD cases<sup>7–11</sup> with the exception of a recent large study from Finland showing an association between maternal, but not paternal age and ASD in cases without ID.<sup>12</sup> Similarly, in the two studies to date exploring the potential interaction between maternal and paternal age,<sup>13,14</sup> no

results are presented by ID, but rather by current ICD classification codes,<sup>13</sup> which have questionable diagnostic reliability.<sup>15</sup>

The majority of previous studies of parental age and ASD have used categorical parameterizations of parental age. Whereas categorical parameterizations allow for easily interpretable results, continuous parameterizations of age allow for flexible, non-linear associations that are frequently less biased and more efficient.<sup>16</sup> We used penalized cubic regression smoothing splines implemented in generalized additive models (GAMs) to model the independent and dependent associations of maternal and paternal age and risk of offspring ASD, subtyped by co-morbid ID, using a large, Swedish total-population-based cohort.

## Methods

### Study population

The Stockholm Youth Cohort (SYC) is a longitudinal register-based cohort of the total child population aged 0–17 years and resident in Stockholm County, Sweden, between 1 January 2001 and 31 December 2007. The register comprises prospectively compiled data on children and their

first-degree relatives through record linkage with a range of Swedish national and regional health and administrative registers. The primary key to record linkage was the unique personal identification number assigned to each Swedish citizen at birth, or upon arrival in Sweden for immigrants.<sup>17</sup> A full description of the SYC and the national and regional registers used to characterize the SYC is available elsewhere.<sup>18</sup> Ethical approval was obtained from the research ethics committee at Karolinska Institutet.

In the present study we examined the 1984 to 2003 birth cohorts of the SYC, with a total of 442 848 non-adopted children who had resided in Stockholm County for at least 4 years. All children with missing data on either maternal or paternal age were excluded ( $N=25\,545$ ), resulting in a final analytical sample of 417 303 individuals.

### ASD diagnosis and validity

ASD case status as of 31 December 2007, was ascertained using national and regional registers covering all known pathways of ASD diagnosis and care in Stockholm County.<sup>18</sup> Intellectual disability was ascertained as a recorded diagnosis of 317-319 or F70-79 according to the ICD-9 and ICD-10, respectively, and 317-319 according to the DSM-IV diagnostic classification manual. The validation of ASD case ascertainment through review of medical records found that 96.0% of cases with ASD were consistent with an ASD diagnosis.<sup>18</sup>

### Covariate description

Biological parents and their dates of birth were identified from the Multi-generation Register.<sup>19</sup> Parity was identified from the Medical Birth Register. Sociodemographic data were extracted from the Integrated Database for Labour Market Research for the year before birth of the child, or as close as possible. Maternal and paternal educational attainment, i.e. completed degree of education, was categorized as primary school (including 9 years of schooling), secondary school (2–3 more years of schooling) or higher education. Occupational class (the higher of the mother or father) was categorized as: unskilled manual worker, skilled manual worker, lower-level non-manual employee, intermediate level non-manual employee, high level non-manual employee, self-employed and unclassified (those without a formal occupation). Family income was calculated after deductions of taxes and is adjusted for family size. To account for inflation, family income was categorized into quintiles according to birth year. From the Social Insurance Agency, we extracted data on whether the mother and father were receiving social subsidies and disability pensions at time of childbirth. History of parental

psychiatric care was obtained from the National Patient Register, Stockholm Adult Psychiatric Register, VAL database (including public healthcare services in Stockholm County) and the Clinical Database for Child- and Adolescent Psychiatry in Stockholm, and dichotomized into outcomes of maternal and paternal history of in- or outpatient psychiatric use, respectively. Data on maternal country of birth were obtained from the Register of Total Population, and categorized as mother born in Sweden, mother born in Europe outside Sweden and mother born outside Europe.

### Data analysis

We used penalized cubic regression smoothing splines implemented in GAMs to model the associations of parental age with ASD.<sup>20</sup> Models were adjusted for potential confounders a priori identified by literature<sup>4,21</sup> or in our analyses as predictive of ASD.<sup>22,23</sup> Model covariates included offspring sex, birth year, co-parental age, parity, maternal and paternal psychiatric history, occupational class, family income and maternal country of birth. To account for clustering in sibships, random effects modelling was used. Random effects for the birth mother were implemented in the GAMs as penalized regression terms, with smoothing parameter estimation by maximum likelihood.<sup>24</sup> Marginal estimates of odds ratios (ORs) and age-specific prevalence rates were estimated from the GAMs using a G-computation approach.<sup>25</sup> These estimates can be interpreted as relevant for a sample assuming the covariate pattern of the sample in the study (e.g. 51.3% male children, 74.9% of mothers from Sweden, see Table 1).<sup>26</sup> For computational efficiency, 95% confidence intervals (CIs) were estimated from posterior simulation of model parameters.<sup>20</sup> To minimize instability in estimates at extreme parental ages (i.e. beyond the 0.1% and 99.9%; fathers <18 years or >59 years of age, mothers <16 years or >45 years of age), GAMs were fit excluding these observations.

To examine possible interaction between maternal and paternal age, parental ages were parameterized with main effects smooths as well as a tensor product smooth interaction of maternal and paternal ages. Statistical significance of the maternal and paternal age interaction was examined using likelihood ratio testing comparing nested models. To further explore the maternal and paternal age interaction, we conducted stratified analyses. In selected strata of maternal and paternal ages, we examined GAMs with a linear or linear-spline basis for the parental age term of interest, the co-parental age smoothed with penalized cubic regression splines, and the aforementioned covariates.

To estimate categorical age effects from the GAMs, we pooled specific age estimates obtained from the GAMs via

**Table 1.** Selected characteristics of the Stockholm Youth Cohort birth cohorts from 1984 to 2003, by ASD category; mean (SD) provided for continuous covariates

| Characteristics                                 | No ASD<br>(N = 412 557) | Any ASD<br>(N = 4746) | ASD without ID<br>(N = 2752) | ASD with ID<br>(N = 1994) |
|-------------------------------------------------|-------------------------|-----------------------|------------------------------|---------------------------|
| Male (%) <sup>a</sup>                           | 51.1                    | 72.8                  | 72.1                         | 73.8                      |
| Maternal age at delivery, years <sup>a</sup>    | 29.5 (5.1)              | 29.7 (5.5)            | 29.5 (5.5)                   | 30.0 (5.6)                |
| Paternal age at delivery, years <sup>a</sup>    | 32.5 (6.3)              | 32.8 (6.7)            | 32.3 (6.5)                   | 33.4 (6.8)                |
| Parity (%) <sup>a</sup>                         |                         |                       |                              |                           |
| 1                                               | 45.8                    | 48.4                  | 51.9                         | 43.5                      |
| 2                                               | 36.3                    | 34.0                  | 32.0                         | 36.8                      |
| ≥3                                              | 17.9                    | 17.6                  | 16.1                         | 19.7                      |
| Multiple births (%)                             | 2.7                     | 2.9                   | 2.3                          | 3.8                       |
| Family income (%) <sup>a</sup>                  |                         |                       |                              |                           |
| Q1 (lowest)                                     | 20.2                    | 20.0                  | 17.1                         | 23.9                      |
| Q2                                              | 20.0                    | 23.3                  | 22.9                         | 23.9                      |
| Q3                                              | 19.9                    | 21.6                  | 23.5                         | 19.1                      |
| Q4                                              | 20.0                    | 18.0                  | 19.0                         | 16.6                      |
| Q5 (highest)                                    | 19.9                    | 17.1                  | 17.5                         | 16.5                      |
| Occupational class (%) <sup>a</sup>             |                         |                       |                              |                           |
| Unskilled manual                                | 13.5                    | 17.4                  | 17.6                         | 17.2                      |
| Skilled manual                                  | 13.6                    | 15.3                  | 15.6                         | 14.9                      |
| Non-manual low-level                            | 13.8                    | 13.3                  | 14.1                         | 12.0                      |
| Non-manual intermediate                         | 19.1                    | 17.8                  | 19.4                         | 15.5                      |
| Non-manual high-level                           | 17.4                    | 17.2                  | 16.8                         | 17.8                      |
| Self-employed                                   | 4.7                     | 3.8                   | 3.4                          | 4.3                       |
| Unclassified                                    | 17.9                    | 15.3                  | 13.2                         | 18.3                      |
| Maternal psychiatric history (%) <sup>a,b</sup> | 30.6                    | 46.3                  | 49.6                         | 41.8                      |
| Paternal psychiatric history (%) <sup>a,b</sup> | 19.5                    | 27.5                  | 28.0                         | 26.7                      |
| Maternal region of origin (%)                   |                         |                       |                              |                           |
| Born in Sweden                                  | 74.9                    | 75.4                  | 81.2                         | 67.3                      |
| Born in Europe outside Sweden                   | 9.3                     | 10.1                  | 9.9                          | 10.4                      |
| Born outside Europe                             | 15.9                    | 14.5                  | 8.8                          | 22.3                      |

<sup>a</sup>Indicates that *P*-value <0.05 from *t* test (continuous variables) or chi-square test (categorical variables) comparing no ASD and any ASD groups.

<sup>b</sup>Parental psychiatric history is defined as maternal and paternal history of in- or outpatient psychiatric care utilization according to healthcare registers, respectively.

the generalized invariance method, using a model with maternal and paternal age main effects smooths, tensor product smooth interaction of maternal and paternal age, and the aforementioned covariates.<sup>20</sup>

All analyses were conducted using SAS version 9.2<sup>27</sup> and R 2.15.<sup>28</sup> GAMs were implemented using the *mgcv* package in R.

## Results

### Sample characteristics

Our final sample included 417 303 individuals of whom 4746 (1.1%) had an ASD. These included 1994 (42.0%) cases with a recorded intellectual disability (ID) and 2752 (58.0%) cases without ID. Compared with non-ASD cases, ASD cases had slightly older mothers and fathers

(Table 1). As previously reported,<sup>22,23</sup> ASD cases were more likely to be male, firstborn, have less family income, be of manual occupational class and have a parent with a history of psychiatric care utilization, as compared with individuals without ASD.

The mean age at delivery for mothers delivering in 1984 was 28.6 years [standard deviation (SD) 5.3] and increased to 31.2 years (SD 4.9) by 2003 (Figure 1). For fathers, the mean age at delivery increased from 31.6 years (SD 6.2) in 1984 to 34.0 years in 2003 (SD 6.0).

### Maternal and paternal age effects

The odds of ASD were unaffected by maternal ages younger than 29 years, but thereafter increased in a non-linear fashion with each advancing year of maternal age (Figure 2). Pooled ORs were 1.07 (95% CI: 1.04–1.11) for

mothers aged 30–34 and 1.32 (95% CI: 1.27–1.38) for ages 35–39, increasing to 1.75 (95% CI: 1.63–1.89) for ages 40–45 compared with the 29-year-old reference group (Table 2). Maternal ages beyond 30 years were associated with a greater risk of ASD with ID, compared with without ID, such that the pooled OR was 2.04 (95% CI: 1.82–2.30) for mothers aged 40–45 and 1.54 (95% CI: 1.41–1.68) for these subtypes, respectively.

In contrast, advancing paternal age was associated with an increasing risk of ASD in an approximately linear fashion, such that the youngest fathers had the lowest risk (Figure 2). Compared with 32-year-old fathers, 18–19- and 25–28-year-old fathers had a 0.84 (95% CI: 0.78–0.90) and 0.93 (95% CI: 0.90–0.96) odds of a child with ASD, whereas 40–44- and 55–59-year-old fathers had a 1.14 (95% CI: 1.10–1.18) and 1.39 (95% CI: 1.29–1.50) odds of a child with ASD. Advancing paternal age was associated with a greater risk of ASD with, than without, ID, such that the oldest fathers aged 55–59 years had 1.52

(95% CI: 1.36–1.70) and 1.19 (95% CI: 1.08–1.31) odds of a child with these subcategories, respectively.

The absolute risk at a given maternal age was greater than the absolute risk at that same paternal age; for example, mothers aged 35–39 were estimated to have 14.06 (95% CI: 13.54–14.59) ASD cases per 1000 births (Table 2), whereas similarly aged fathers were estimated to have 12.36 (95% CI: 12.11–12.62) ASD cases per 1000 births. This increased risk for maternal age was more evident among the oldest parents. Mothers aged 40–45 ( $\geq 97.2$ th percentile) were estimated to have 18.63 (95% CI: 17.25–20.01) ASD cases per 1000 births, which was higher than the absolute risk for fathers aged 55–59 ( $\geq 99.7$ th percentile) estimated at 16.35 (95% CI: 15.11–17.58) ASD cases per 1000 births.

### Interaction of maternal age and paternal age

In GAMs of ASD and ASD with ID, inclusion of a maternal and paternal age interaction significantly improved model fit over models without the interaction ( $P$ -values = 0.014 and 0.003, respectively), but not for ASD without ID ( $P$ -value: 0.275). To explore the nature of the interaction, we conducted stratified analyses at parental ages typically recognized as older (mothers:  $\leq 35$  vs  $> 35$  years; fathers:  $\leq 40$  vs  $> 40$  years). In mothers  $< 35$  years, 1-year and 5-year increases in paternal age linearly increased the odds of a child with ASD by 1.02 (95% CI: 1.01–1.02) and 1.08 (95% CI: 1.05–1.12) times, respectively (Figure 3a). In contrast, in mothers  $> 35$ , paternal age did not appear to influence the odds of ASD (Figure 3b). In fathers  $< 40$  years, a 1-year increase in maternal age prior to 30 years had no impact on ASD risk (OR: 1.00; 95% CI: 0.99–1.01). However, maternal age above 30 years increased the odds of ASD among fathers  $< 40$  years, such

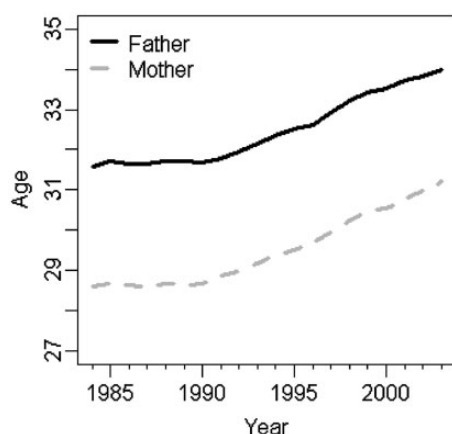

**Figure 1.** Mean parental age (years) at time of birth, 1984–2003 birth cohorts of the Stockholm Youth Cohort (N = 417 303).

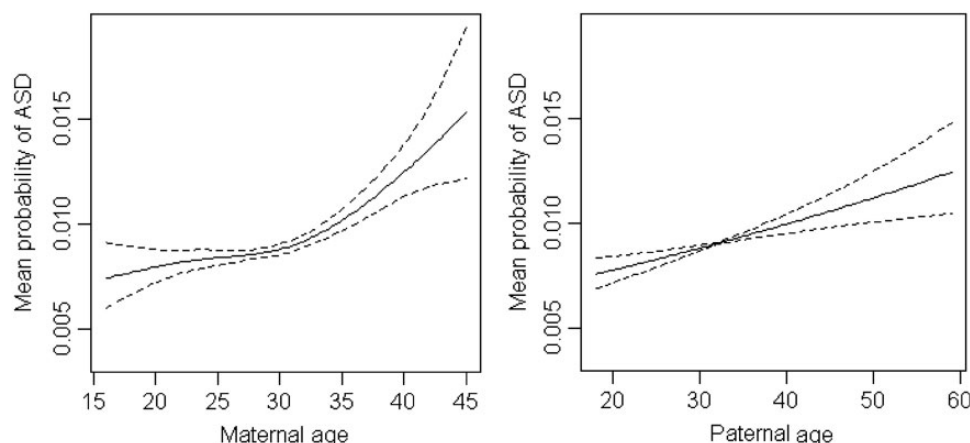

**Figure 2.** Generalized additive model estimates of probability of ASD by maternal and paternal age (years) in the Stockholm Youth Cohort. The 95% CIs are indicated by dashed lines.



**Table 2.** Pooled maternal and paternal age estimates (years) for the prevalence of ASD (assuming the covariate pattern of the study sample) and odds ratios with reference to median parental age, by level of intellectual disability

| Estimate            | ASD                 |                        | ASD with ID       |                        | ASD without ID    |                        |
|---------------------|---------------------|------------------------|-------------------|------------------------|-------------------|------------------------|
|                     | N cases/ 1000       | Pooled OR <sup>a</sup> | N cases/ 1000     | Pooled OR <sup>a</sup> | N cases/ 1000     | Pooled OR <sup>a</sup> |
| <b>Maternal age</b> |                     |                        |                   |                        |                   |                        |
| 16-19               | 10.63 (9.60-11.65)  | 0.98 (0.88-1.08)       | 4.40 (3.64-5.16)  | 0.96 (0.81-1.13)       | 6.00 (5.40-6.61)  | 0.93 (0.84-1.04)       |
| 20-24               | 10.85 (10.45-11.24) | 1.00 (0.96-1.05)       | 4.93 (4.63-5.23)  | 1.09 (1.01-1.16)       | 6.03 (5.76-6.30)  | 0.94 (0.88-0.99)       |
| 25-28               | 10.77 (10.53-11.02) | 1.00 (0.96-1.03)       | 4.67 (4.50-4.84)  | 1.04 (0.99-1.10)       | 6.23 (6.06-6.40)  | 0.97 (0.92-1.01)       |
| 29                  | 10.82 (10.37-11.25) | reference              | 4.49 (4.22-4.81)  | reference              | 6.44 (6.15-6.78)  | reference              |
| 30-34               | 11.50 (11.26-11.75) | 1.07 (1.04-1.11)       | 4.76 (4.60-4.93)  | 1.07 (1.02-1.12)       | 6.87 (6.69-7.05)  | 1.07 (1.04-1.12)       |
| 35-39               | 14.06 (13.54-14.59) | 1.32 (1.27-1.38)       | 6.31 (5.93-6.68)  | 1.44 (1.34-1.54)       | 8.05 (7.68-8.43)  | 1.26 (1.20-1.33)       |
| 40-45               | 18.63 (17.25-20.01) | 1.75 (1.63-1.89)       | 9.15 (8.05-10.26) | 2.04 (1.82-2.30)       | 9.84 (8.97-10.70) | 1.54 (1.41-1.68)       |
| <b>Paternal age</b> |                     |                        |                   |                        |                   |                        |
| 18-19               | 9.78 (9.12-10.44)   | 0.84 (0.78-0.90)       | 4.21 (3.61-4.81)  | 0.79 (0.71-0.90)       | 6.12 (5.63-6.61)  | 0.91 (0.83-1.00)       |
| 20-24               | 10.27 (9.94-10.61)  | 0.88 (0.85-0.91)       | 4.38 (4.11-4.66)  | 0.85 (0.80-0.90)       | 6.28 (6.02-6.54)  | 0.93 (0.89-0.98)       |
| 25-28               | 10.86 (10.59-11.13) | 0.93 (0.90-0.96)       | 4.63 (4.42-4.84)  | 0.91 (0.87-0.96)       | 6.47 (6.27-6.68)  | 0.96 (0.92-1.01)       |
| 29-31               | 11.34 (11.09-11.59) | 0.98 (0.94-1.01)       | 4.88 (4.70-5.06)  | 0.97 (0.92-1.02)       | 6.63 (6.44-6.81)  | 0.99 (0.94-1.03)       |
| 32                  | 11.62 (11.21-12.06) | reference              | 5.03 (4.74-5.32)  | reference              | 6.71 (6.40-7.03)  | reference              |
| 33-34               | 11.85 (11.54-12.16) | 1.02 (0.98-1.06)       | 5.16 (4.95-5.37)  | 1.03 (0.96-1.09)       | 6.79 (6.55-7.03)  | 1.01 (0.96-1.07)       |
| 35-39               | 12.36 (12.11-12.62) | 1.07 (1.04-1.10)       | 5.45 (5.28-5.63)  | 1.09 (1.04-1.13)       | 6.93 (6.74-7.13)  | 1.03 (1.00-1.07)       |
| 40-44               | 13.24 (12.83-13.66) | 1.14 (1.10-1.18)       | 5.95 (5.66-6.24)  | 1.18 (1.12-1.25)       | 7.19 (6.88-7.49)  | 1.07 (1.02-1.12)       |
| 45-49               | 14.16 (13.51-14.80) | 1.22 (1.16-1.28)       | 6.49 (6.05-6.94)  | 1.28 (1.20-1.38)       | 7.47 (7.02-7.91)  | 1.11 (1.04-1.18)       |
| 50-54               | 15.20 (14.31-16.10) | 1.30 (1.23-1.38)       | 7.05 (6.39-7.70)  | 1.40 (1.27-1.53)       | 7.76 (7.17-8.35)  | 1.15 (1.07-1.25)       |
| 55-59               | 16.35 (15.11-17.58) | 1.39 (1.29-1.50)       | 7.69 (6.81-8.57)  | 1.52 (1.36-1.70)       | 8.02 (7.23-8.80)  | 1.19 (1.08-1.31)       |

<sup>a</sup>Pooled estimates are obtained from generalized additive models via the generalized invariance method. The GAM includes maternal and paternal age main effects penalized cubic regression spline smooths, tensor product smooth interaction of maternal and paternal age, birth year, offspring sex, parity, maternal and paternal psychiatric history, occupational class, family income, maternal region of birth and random effects for birth mother. The estimated N of cases per 1000 are population-average estimates calculated from GAMs assuming the covariate pattern of the sample (see Methods).

that 1-year and 5-year increases in maternal age affected the odds of a child with ASD by 1.04 (95% CI: 1.02-1.07) and 1.23 (95% CI: 1.11-1.37) times, respectively (Figure 3c). In fathers >40 years, 1-year and 5-year increases in maternal age increased the odds of a child with ASD by 1.02 (95% CI: 1.00-1.04) and 1.12 (95% CI: 1.02-1.23), respectively (Figure 3d).

Discussion

In this large population-based study, we demonstrated that whereas both advancing maternal and paternal ages are associated with increased risk of ASD, the nature of the associations was different. Whereas the maternal age effect was non-linear with the sharpest increase in risk after age 30, the paternal age effect was linear. Comparatively speaking, the risk of offspring ASD was greater for a given maternal age than for the same paternal age. Furthermore, advancing maternal age increased the risk of ASD regardless of paternal age, whereas advancing paternal age linearly increased risk of offspring ASD only in mothers younger than 35 years. Finally, we found that advancing

maternal and paternal age imposed greater risk of ASD with, than without, ID.

To our knowledge, this is the first population-based study with a large sample of ASD cases, based on an exhaustive case ascertainment methodology relying on valid register-based diagnoses,<sup>18</sup> which provides sufficient power to study ASD according to ID.<sup>5</sup> Although we confirmed a lower proportion of cases ASD with ID, than without ID, in our validation study,<sup>18</sup> it is plausible that many children with severe autistic symptoms have not been eligible for structured intelligence tests, which were required as part of ASD subtype confirmation.

A number of mechanisms underlying the association between parental age and offspring ASD have been proposed; however, mechanisms underlying maternal and paternal age effects are likely different, although the differences are difficult to disentangle due to high correlation between maternal and paternal age. The mechanisms most frequently proposed to underlie paternal age effects are increased rates of *de novo* mutations<sup>29-32</sup> and epigenetic alternations<sup>33</sup> with increasing age. In addition to the increased rates of genomic alternations with increasing maternal age<sup>34,35</sup> proposed to underlie maternal age effects,

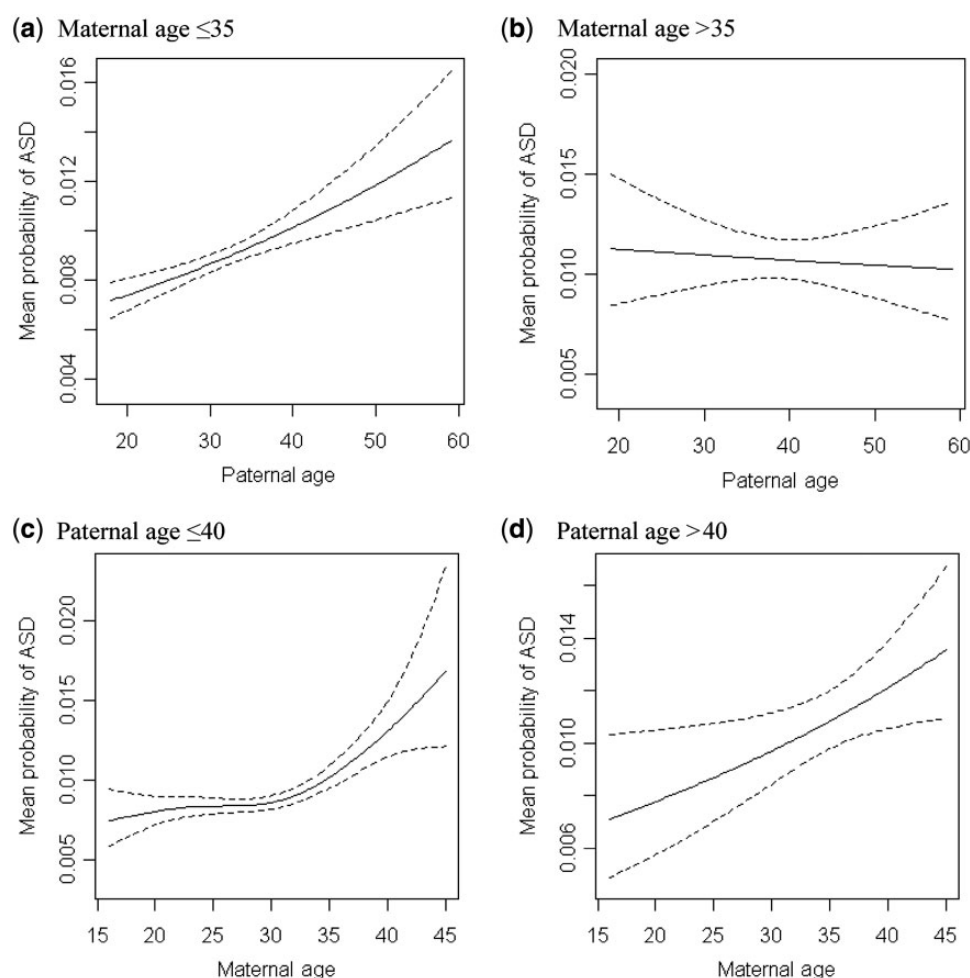

**Figure 3.** Generalized additive model estimates of probability of ASD by maternal and paternal age (years) in the Stockholm Youth Cohort, stratified by co-parental age category. The 95% CIs are indicated by dashed lines.

increasing maternal age is associated with increased exposure to environmental factors such as cumulative exposure to air pollution<sup>36</sup> or medications,<sup>37</sup> reported to increase risk of ASD. Furthermore, perinatal and obstetric complications that present at a much higher rate in older mothers<sup>38</sup> have been shown to increase risk of ASD.<sup>21,39,40</sup> With increasing age, mothers may be increasingly subjected to other factors associated with ASD, such as autoimmunity,<sup>41</sup> metabolic conditions<sup>42</sup> or nutritional deficiencies.<sup>43</sup> Finally, it has been suggested that parental age effects on risk of neurodevelopmental disorders are the result of unmeasured confounding by mental disorders or personality traits related to these which defer parenthood among fathers,<sup>44</sup> or psychosocial environmental characteristics related to having older parents.<sup>45</sup>

Our findings of a linear paternal age effect support the hypothesis of increased genomic alternations with increasing paternal age; in fact the linear effect bears striking resemblance to the linear increase in *de novo* mutations with increasing paternal age observed in a recent Icelandic

study.<sup>46</sup> In contrast, the non-linear maternal age effects found in our study support the inference that multiple mechanisms may be at play. Whereas increased rates of genomic alternations may play a role, the sharp increase in ASD risk after age 30 is consistent with well-established knowledge of riskier pregnancies and perinatal outcomes in mothers aged above 35.<sup>47</sup> Interestingly, although both maternal and paternal age increase the rate of *de novo* mutations in offspring, the same increase in maternal vs paternal age resulted in 60% larger number of mutations in a recent study.<sup>29</sup> In line with our results, two recent studies examining effects of interactions of maternal and paternal age on ASD risk, found increasing paternal age to increase ASD risk primarily in mothers younger than 30,<sup>14</sup> and only in mothers younger than 35 years,<sup>13</sup> respectively. We speculate that this finding may be related to a lower risk of pregnancy complications and other non-heritable risk factors in mothers younger than 35, in whom the paternal age effect is consequently most evident. When risk of perinatal and obstetric complications increases among mothers older

than 35, such risk may overwhelm the risk conferred by advancing paternal age. Thus, our results suggest that among parents older than 35 years, an age typically recognized by the medical community as associated with riskier pregnancy outcomes, an increase of  $n$  years in maternal age has greater implications for ASD risk than a similar increase in paternal age.

Although evidence is inconsistent, advanced maternal age has been associated with decreased offspring intelligence,<sup>48,49</sup> which may contribute to the stronger association with ASD with ID observed in our study. Similarly, advanced paternal age has been associated with decreased offspring intelligence in some<sup>48,50</sup> but not all studies.<sup>49,51</sup> Direct comparison of our results with previous studies is obstructed by the variable proportion of ASD cases with ID included in previous studies. However, our findings contrast recent meta-analytical reports on the lack of variation of maternal age effects on the risk of ASD by the proportion of cases diagnosed with autistic disorder,<sup>3</sup> which is associated with some degree of intellectual disability in a majority (70%) of cases.<sup>52</sup> Similarly, the association between paternal age and autism was unaltered by removal of studies including high rates of ASD in a meta-analysis of paternal age.<sup>2</sup> In more agreement with our results, maternal age had a slightly stronger association with risk of autistic disorder compared with other ASD in a recent Danish study,<sup>13</sup> which may be related to a similar study design including broad case ascertainment, large sample sizes and inclusion of cases with a broad diagnosis of ASD.

In conclusion, while our results support the conclusion that advancing parental age increases risk of ASD, maternal age appears to be a more important risk factor for ASD than paternal age, contrasting recent emphasis on paternal<sup>4</sup> or even grandpaternal age<sup>53</sup> and indicating that further research on identifying the mechanisms contributing to the effects of maternal and paternal age is needed.

## Funding

Financial support was provided by Stockholm County Council, and Autism Speaks grant #7618. None of the above-listed funding agencies were involved in the study design, conduct of the research, data analysis and interpretation or manuscript preparation.

**Conflict of interest:** None declared.

## References

- Bray I, Gunnell D, Davey Smith G. Advanced paternal age: how old is too old? *J Epidemiology Community Health* 2006;**60**: 851–53.
- Hultman CM, Sandin S, Levine SZ, Lichtenstein P, Reichenberg A. Advancing paternal age and risk of autism: new evidence from a population-based study and a meta-analysis of epidemiological studies. *Mol Psychiatry* 2011;**16**:1203–12.
- Sandin S, Hultman CM, Kolvezon A, Gross R, MacCabe JH, Reichenberg A. Advancing maternal age is associated with increasing risk for autism: a review and meta-analysis. *J Am Acad Child Adolesc Psychiatry* 2012;**51**:477–86 e1.
- Gardener H, Spiegelman D, Buka SL. Prenatal risk factors for autism: comprehensive meta-analysis. *Br J Psychiatry* 2009;**195**: 7–14.
- Szatmari P, White J, Merikangas KR. The use of genetic epidemiology to guide classification in child and adult psychopathology. *Int Rev Psychiatry* 2007;**19**:483–96.
- Howlin P, Goode S, Hutton J, Rutter M. Adult outcome for children with autism. *J Child Psychol Psychiatry* 2004;**45**: 212–29.
- Baxter AC, Lotspeich LJ, Spiker D, Martin JL, Grether JK, Hallmayer JF. Brief report: effect of maternal age on severity of autism. *J Autism Dev Disord* 2007;**37**:976–82.
- Cryan E, Byrne M, O'Donovan A, O'Callaghan E. A case-control study of obstetric complications and later autistic disorder. *J Autism Dev Disord* 1996;**26**:453–60.
- Pinborough-Zimmerman J, Bilder D, Bakian A *et al*. Sociodemographic risk factors associated with autism spectrum disorders and intellectual disability. *Autism Res* 2011;**4**:438–48.
- Steinhausen HC, Gobel D, Breinlinger M, Wohlleben B. Maternal age and autistic children. *J Dev Behav Pediatr* 1984; **5**:343–45.
- Tsuchiya KJ, Matsumoto K, Miyachi T *et al*. Paternal age at birth and high-functioning autistic-spectrum disorder in offspring. *Br J Psychiatry* 2008;**193**:316–21.
- Lampi KM, Hinkka-Yli-Salomaki S, Lehti V *et al*. Parental age and risk of autism spectrum disorders in a Finnish national birth cohort. *J Autism Dev Disord* 2013;**43**:2526–35.
- Parner ET, Baron-Cohen S, Lauritsen MB *et al*. Parental age and autism spectrum disorders. *Ann Epidemiol* 2012;**22**:143–50.
- Shelton JF, Tancredi DJ, Hertz-Picciotto I. Independent and dependent contributions of advanced maternal and paternal ages to autism risk. *Autism Res* 2010;**3**:30–39.
- Lord C, Petkova E, Hus V *et al*. A multisite study of the clinical diagnosis of different autism spectrum disorders. *Arch Gen Psych* 2012;**69**:306–13.
- Greenland S. Dose-response and trend analysis in epidemiology: alternatives to categorical analysis. *Epidemiology* 1995;**6**: 356–65.
- Ludvigsson JF, Otterblad-Olausson P, Pettersson BU, Ekblom A. The Swedish personal identity number: possibilities and pitfalls in healthcare and medical research. *Eur J Epidemiol* 2009;**24**: 659–67.
- Idring S, Rai D, Dal H *et al*. Autism spectrum disorders in the Stockholm Youth Cohort: design, prevalence and validity. *PLoS One* 2012;**7**:e41280.
- Multi-Generation Register 2007: A Description of Contents and Quality. Örebro, Sweden: Population and Welfare Department, Statistics Sweden, 2008.
- Wood SN. *Generalized Additive Models: An Introduction With R*. Boca Raton: Chapman & Hall/CRC;2006.
- Gardener H, Spiegelman D, Buka SL. Perinatal and neonatal risk factors for autism: a comprehensive meta-analysis. *Pediatrics* 2011;**128**:344–55.



22. Magnusson C, Dheeraj R, Goodman A *et al.* Migration and autism-spectrum disorder: population-based study. *Br J Psychiatry* 2012;201:109–15.
23. Rai D, Lewis G, Lundberg M *et al.* Parental socioeconomic status and risk of offspring autism spectrum disorders in a Swedish population-based study. *J Am Acad Child Adolesc Psychiatry* 2012;51: 467–76.
24. Wood SN. Fast stable direct fitting and smoothness selection for generalized additive models. *J R Stat Soc* 2008;70:495–518.
25. Snowden JM, Rose S, Mortimer KM. Implementation of G-computation on a simulated data set: demonstration of a causal inference technique. *Am J Epidemiol* 2011;173:731–38.
26. Hoffman K, Vieira VM, Daniels JL. Brief report: diminishing geographic variability in autism spectrum disorders over time? *J Autism Dev Disord* 20 Aug 2013; Epub ahead of print. PMID: 23959585.
27. SAS. Cary, NC: SAS Institute.
28. Team RC. R: A Language and Environment for Statistical Computing. Vienna: R Foundation for Statistical Computing, 2012.
29. Neale BM, Kou Y, Liu L *et al.* Patterns and rates of exonic de novo mutations in autism spectrum disorders. *Nature* 2012; 485:242–45.
30. O’Roak BJ, Vives L, Girirajan S *et al.* Sporadic autism exomes reveal a highly interconnected protein network of de novo mutations. *Nature* 2012;485:246–50.
31. Sanders SJ, Murtha MT, Gupta AR *et al.* De novo mutations revealed by whole-exome sequencing are strongly associated with autism. *Nature* 2013;485:237–41.
32. Sebat J, Lakshmi B, Malhotra D *et al.* Strong association of de novo copy number mutations with autism. *Science* 2007;316:445–49.
33. Flanagan JM, Pependikyte V, Pozdniakovaite N *et al.* Intra- and interindividual epigenetic variation in human germ cells. *Am J Hum Genet* 2006;79:67–84.
34. Ginsburg C, Fokstuen S, Schinzel A. The contribution of uniparental disomy to congenital development defects in children born to mothers at advanced childbearing age. *Am J Med Genet* 2000;95:454–60.
35. Kaytor MD, Burright EN, Duvick LA, Zoghbi HY, Orr HT. Increased trinucleotide repeat instability with advanced maternal age. *Hum Mol Genet* 1997;6:2135–39.
36. Volk HE, Lurmann F, Penfold B, Hertz-Picciotto I, McConnell R. Traffic-related air pollution, particulate matter, and autism. *JAMA Psychiatry* 2013;70:71–77.
37. Rai D, Lee BK, Dalman C, Golding J, Lewis G, Magnusson C. Parental depression, maternal antidepressant use during pregnancy, and risk of autism spectrum disorders: population based case-control study. *BMJ* 2013;346:f2059.
38. Cnattingius S, Forman MR, Berendes HW, Isotalo L. Delayed childbearing and risk of adverse perinatal outcome. A population-based study. *JAMA* 1992;268:886–90.
39. Abel KM, Dalman C, Svensson AC *et al.* Deviance in fetal growth and risk of autism spectrum disorder. *Am J Psychiatry* 2013;170:391–98.
40. Buchmayer S, Johansson S, Johansson A, Hultman CM, Sparen P, Cnattingius S. Can association between preterm birth and autism be explained by maternal or neonatal morbidity? *Pediatrics* 2009;124:e817–25.
41. Atladottir HO, Pedersen MG, Thorsen P *et al.* Association of family history of autoimmune diseases and autism spectrum disorders. *Pediatrics* 2009;124:687–94.
42. Krakowiak P, Walker CK, Bremer AA *et al.* Maternal metabolic conditions and risk for autism and other neurodevelopmental disorders. *Pediatrics* 2012;129:e1121–28.
43. Schmidt RJ, Tancredi DJ, Ozonoff S *et al.* Maternal periconceptional folic acid intake and risk of autism spectrum disorders and developmental delay in the CHARGE (CHildhood Autism Risks from Genetics and Environment) case-control study. *Am J Clin Nutr* 2012;96:80–89.
44. Petersen L, Mortensen PB, Pedersen CB. Paternal age at birth of first child and risk of schizophrenia. *Am J Psychiatry* 2011;168:82–88.
45. Ek M, Wicks S, Magnusson C, Dalman C. Adoptive paternal age and risk of psychosis in adoptees: a register based cohort study. *PloS One* 2012;7:e47334.
46. Kong A, Frigge ML, Masson G *et al.* Rate of de novo mutations and the importance of father’s age to disease risk. *Nature* 2012;488:471–75.
47. Usta IM, Nassar AH. Advanced maternal age. Part I: obstetric complications. *Am J Perinat* 2008;25:521–34.
48. Malaspina D, Reichenberg A, Weiser M *et al.* Paternal age and intelligence: implications for age-related genomic changes in male germ cells. *Psychiatr Genet* 2005;15:117–25.
49. Myrskylä M, Silventoinen K, Tynelius P, Rasmussen F. Is later better or worse? Association of advanced parental age with offspring cognitive ability among half a million young Swedish men. *Am J Epidemiol* 2013;177:649–55.
50. Saha S, Barnett AG, Foldi C *et al.* Advanced paternal age is associated with impaired neurocognitive outcomes during infancy and childhood. *PLoS Med* 2009;6:e40.
51. Svensson AC, Abel K, Dalman C, Magnusson C. Implications of advancing paternal age: does it affect offspring school performance? *PloS One* 2011;6:e24771.
52. Chakrabarti S, Fombonne E. Pervasive developmental disorders in preschool children. *JAMA* 2001;285:3093–99.
53. Frans EM, Sandin S, Reichenberg A *et al.* Autism risk across generations: a population-based study of advancing grandpaternal and paternal age. *JAMA Psychiatry* 2013;70:516–21.
